# Supplementary material
Source: PubMed Central journal article supplement (PMC2662051)
Supplement: supp_283_44_29645__1.pdf [file supp_283_44_29645__1.pdf]

## Malcolm A. Leissring

---

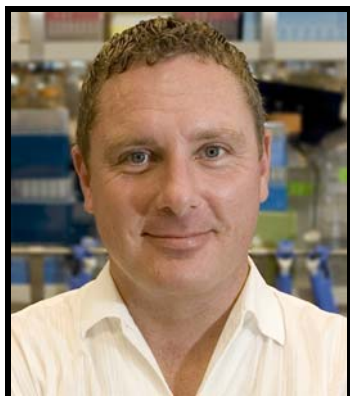

**Current Position:** Assistant Professor in the Department of Neuroscience at Mayo Clinic Jacksonville in Florida

**Education:** Ph.D. in Neurobiology and Behavior (2000) from the University of California at Irvine

**Non-scientific Interests:** Guitar, music composition

My research career began in 1988 at the University of California at Berkeley, where I was engaged in basic research investigating how opioid peptides affect different stages of memory formation. Seeking to apply my experience in learning and memory to human disorders, I conducted my predoctoral work in the laboratory of Dr. Frank LaFerla at the University of California at Irvine. In addition to gaining experience with the generation and characterization of transgenic mouse models, my work there focused on the effects of Alzheimer disease-associated mutations in the presenilin proteins on intracellular calcium signaling. For my postdoctoral studies, I joined the laboratory of Dr. Dennis Selkoe, where I used a transgenic approach to show that proteolytic degradation of the amyloid beta-protein potentially regulates amyloidogenesis in vivo. I also gained experience in high-throughput compound screening and medicinal chemistry, which I hope to apply to the development of novel treatments for Alzheimer disease based on activation or disinhibition of proteases that degrade beta-amyloid.

---

**Read Dr. Leissring's article entitled:** The A $\beta$ Cs of Amyloid  $\beta$ -Protein-cleaving Proteases

<http://www.jbc.org/cgi/content/full/283/44/29645>
